# Supplementary material
Source: Elsevier journal article supplement (http://library.osu.edu/sites/msa/suppmat/v249.i2.pp100-112/mmc2.pdf)
Supplement: mmc2 [file mmc2.pdf]

Matrix of calculated anharmonicity parameters for the excited state of anthranilic acid

|       |      |      |       |       |       |       |       |       |       |       |       |       |       |       |       |        |       |       |       |       |        |        |        |       |       |       |        |        |        |        |        |        |        |      |      |      |       |       |       |       |      |       |        |       |       |       |       |  |  |  |  |  |  |  |  |  |  |  |  |  |  |  |  |  |  |  |  |  |  |  |  |
|-------|------|------|-------|-------|-------|-------|-------|-------|-------|-------|-------|-------|-------|-------|-------|--------|-------|-------|-------|-------|--------|--------|--------|-------|-------|-------|--------|--------|--------|--------|--------|--------|--------|------|------|------|-------|-------|-------|-------|------|-------|--------|-------|-------|-------|-------|--|--|--|--|--|--|--|--|--|--|--|--|--|--|--|--|--|--|--|--|--|--|--|--|
| 1S    | 271  | 263  |       |       |       |       |       |       |       |       |       |       |       |       |       |        |       |       |       |       |        |        |        |       |       |       |        |        |        |        |        |        |        |      |      |      |       |       |       |       |      |       |        |       |       |       |       |  |  |  |  |  |  |  |  |  |  |  |  |  |  |  |  |  |  |  |  |  |  |  |  |
| 2S    | 390  | 383  | -1.11 | -.34  |       |       |       |       |       |       |       |       |       |       |       |        |       |       |       |       |        |        |        |       |       |       |        |        |        |        |        |        |        |      |      |      |       |       |       |       |      |       |        |       |       |       |       |  |  |  |  |  |  |  |  |  |  |  |  |  |  |  |  |  |  |  |  |  |  |  |  |
| 3S    | 437  | 433  | -.49  | -.11  | .00   |       |       |       |       |       |       |       |       |       |       |        |       |       |       |       |        |        |        |       |       |       |        |        |        |        |        |        |        |      |      |      |       |       |       |       |      |       |        |       |       |       |       |  |  |  |  |  |  |  |  |  |  |  |  |  |  |  |  |  |  |  |  |  |  |  |  |
| 4S    | 548  | 542  | -.22  | -.04  | .07   | .76   |       |       |       |       |       |       |       |       |       |        |       |       |       |       |        |        |        |       |       |       |        |        |        |        |        |        |        |      |      |      |       |       |       |       |      |       |        |       |       |       |       |  |  |  |  |  |  |  |  |  |  |  |  |  |  |  |  |  |  |  |  |  |  |  |  |
| 5S    | 590  | 584  | .14   | .12   | .18   | .11   | -.22  |       |       |       |       |       |       |       |       |        |       |       |       |       |        |        |        |       |       |       |        |        |        |        |        |        |        |      |      |      |       |       |       |       |      |       |        |       |       |       |       |  |  |  |  |  |  |  |  |  |  |  |  |  |  |  |  |  |  |  |  |  |  |  |  |
| 6S    | 658  | 651  | .36   | -.45  | -.27  | .16   | -.11  | -.20  |       |       |       |       |       |       |       |        |       |       |       |       |        |        |        |       |       |       |        |        |        |        |        |        |        |      |      |      |       |       |       |       |      |       |        |       |       |       |       |  |  |  |  |  |  |  |  |  |  |  |  |  |  |  |  |  |  |  |  |  |  |  |  |
| 7S    | 772  | 763  | .12   | -.51  | -.71  | -.80  | -.24  | -.72  | -2.68 |       |       |       |       |       |       |        |       |       |       |       |        |        |        |       |       |       |        |        |        |        |        |        |        |      |      |      |       |       |       |       |      |       |        |       |       |       |       |  |  |  |  |  |  |  |  |  |  |  |  |  |  |  |  |  |  |  |  |  |  |  |  |
| 8S    | 921  | 909  | .13   | -.23  | -.21  | -.26  | -.37  | -.28  | -.25  | -.34  |       |       |       |       |       |        |       |       |       |       |        |        |        |       |       |       |        |        |        |        |        |        |        |      |      |      |       |       |       |       |      |       |        |       |       |       |       |  |  |  |  |  |  |  |  |  |  |  |  |  |  |  |  |  |  |  |  |  |  |  |  |
| 9S    | 1081 | 1065 | .40   | -.05  | -.54  | -.50  | .27   | -.24  | -.06  | -.67  | -1.02 |       |       |       |       |        |       |       |       |       |        |        |        |       |       |       |        |        |        |        |        |        |        |      |      |      |       |       |       |       |      |       |        |       |       |       |       |  |  |  |  |  |  |  |  |  |  |  |  |  |  |  |  |  |  |  |  |  |  |  |  |
| 10S   | 1134 | 1108 | -.28  | .03   | -.21  | -1.41 | -.19  | -.13  | .05   | -.34  | -.92  | -1.20 |       |       |       |        |       |       |       |       |        |        |        |       |       |       |        |        |        |        |        |        |        |      |      |      |       |       |       |       |      |       |        |       |       |       |       |  |  |  |  |  |  |  |  |  |  |  |  |  |  |  |  |  |  |  |  |  |  |  |  |
| 11S   | 1182 | 1157 | -1.39 | .89   | -.26  | -1.15 | -.14  | -.56  | -1.81 | -1.08 | -.45  | -.59  | -2.82 |       |       |        |       |       |       |       |        |        |        |       |       |       |        |        |        |        |        |        |        |      |      |      |       |       |       |       |      |       |        |       |       |       |       |  |  |  |  |  |  |  |  |  |  |  |  |  |  |  |  |  |  |  |  |  |  |  |  |
| 12S   | 1239 | 1223 | .20   | -.48  | -.15  | .73   | -.13  | .15   | .10   | -.34  | -.86  | -.01  | -.42  | -.82  |       |        |       |       |       |       |        |        |        |       |       |       |        |        |        |        |        |        |        |      |      |      |       |       |       |       |      |       |        |       |       |       |       |  |  |  |  |  |  |  |  |  |  |  |  |  |  |  |  |  |  |  |  |  |  |  |  |
| 13S   | 1262 | 1244 | -.05  | .19   | -.40  | -.16  | .41   | .42   | -.06  | -.12  | .12   | -.33  | .13   | .81   | 2.00  |        |       |       |       |       |        |        |        |       |       |       |        |        |        |        |        |        |        |      |      |      |       |       |       |       |      |       |        |       |       |       |       |  |  |  |  |  |  |  |  |  |  |  |  |  |  |  |  |  |  |  |  |  |  |  |  |
| 14S   | 1325 | 1283 | -.39  | -.17  | -.53  | -1.45 | .17   | -.07  | -.51  | -.29  | -.25  | -.55  | -3.60 | -.45  | -.22  | -11.32 |       |       |       |       |        |        |        |       |       |       |        |        |        |        |        |        |        |      |      |      |       |       |       |       |      |       |        |       |       |       |       |  |  |  |  |  |  |  |  |  |  |  |  |  |  |  |  |  |  |  |  |  |  |  |  |
| 15S   | 1399 | 1378 | .10   | -.28  | .28   | .21   | -.25  | -.36  | -.31  | -.36  | -.55  | -.56  | -.90  | .01   | .23   | -.89   | -3.52 |       |       |       |        |        |        |       |       |       |        |        |        |        |        |        |        |      |      |      |       |       |       |       |      |       |        |       |       |       |       |  |  |  |  |  |  |  |  |  |  |  |  |  |  |  |  |  |  |  |  |  |  |  |  |
| 16S   | 1480 | 1440 | -.04  | -.43  | -.03  | .22   | -.51  | -.22  | -.07  | -.56  | -.72  | -1.21 | -.61  | -1.88 | -3.02 | -.46   | -.57  | -4.76 |       |       |        |        |        |       |       |       |        |        |        |        |        |        |        |      |      |      |       |       |       |       |      |       |        |       |       |       |       |  |  |  |  |  |  |  |  |  |  |  |  |  |  |  |  |  |  |  |  |  |  |  |  |
| 17S   | 1509 | 1479 | -.37  | -.73  | -.19  | -1.37 | -.35  | .21   | -1.06 | -.82  | -.64  | -1.40 | -4.58 | -.84  | -.44  | -4.65  | -1.71 | -.85  | -4.12 |       |        |        |        |       |       |       |        |        |        |        |        |        |        |      |      |      |       |       |       |       |      |       |        |       |       |       |       |  |  |  |  |  |  |  |  |  |  |  |  |  |  |  |  |  |  |  |  |  |  |  |  |
| 18S   | 1561 | 1519 | -.73  | -2.51 | -.78  | -1.28 | -.46  | -2.71 | 3.82  | -2.51 | -1.48 | -1.68 | -4.97 | -1.41 | -.97  | -3.66  | -2.56 | -1.79 | -6.01 | -4.56 |        |        |        |       |       |       |        |        |        |        |        |        |        |      |      |      |       |       |       |       |      |       |        |       |       |       |       |  |  |  |  |  |  |  |  |  |  |  |  |  |  |  |  |  |  |  |  |  |  |  |  |
| 19S   | 1587 | 1556 | -.31  | -.16  | .21   | -.91  | -1.49 | .91   | -.07  | .56   | -3.23 | -2.77 | -1.21 | -1.02 | -4.44 | -.78   | -.44  | -3.09 | -1.66 | -2.36 | -1.58  |        |        |       |       |       |        |        |        |        |        |        |        |      |      |      |       |       |       |       |      |       |        |       |       |       |       |  |  |  |  |  |  |  |  |  |  |  |  |  |  |  |  |  |  |  |  |  |  |  |  |
| 20S   | 1633 | 1600 | .27   | .73   | -.10  | -.23  | -1.24 | -.47  | -.14  | -1.41 | -3.39 | -2.11 | -.65  | -2.87 | -3.98 | -.59   | -2.07 | -6.62 | -1.42 | -1.87 | -8.30  | -16.62 |        |       |       |       |        |        |        |        |        |        |        |      |      |      |       |       |       |       |      |       |        |       |       |       |       |  |  |  |  |  |  |  |  |  |  |  |  |  |  |  |  |  |  |  |  |  |  |  |  |
| 21S   | 1718 | 1679 | -.78  | -.16  | 1.28  | .16   | -1.44 | -1.30 | -1.04 | -1.10 | -1.55 | -.14  | -1.78 | -2.20 | -1.19 | -1.99  | -4.45 | -5.09 | -3.31 | -2.00 | -4.69  | -4.78  | -3.34  |       |       |       |        |        |        |        |        |        |        |      |      |      |       |       |       |       |      |       |        |       |       |       |       |  |  |  |  |  |  |  |  |  |  |  |  |  |  |  |  |  |  |  |  |  |  |  |  |
| 22S   | 1740 | 1695 | -1.15 | -.38  | .49   | -.66  | -1.09 | -1.28 | -.78  | -1.91 | -2.16 | -2.71 | -.88  | -3.65 | -3.80 | -1.01  | -3.86 | -8.01 | -3.14 | -2.57 | -11.40 | -7.35  | 1.79   | -9.36 |       |       |        |        |        |        |        |        |        |      |      |      |       |       |       |       |      |       |        |       |       |       |       |  |  |  |  |  |  |  |  |  |  |  |  |  |  |  |  |  |  |  |  |  |  |  |  |
| 23S   | 1817 | 1794 | -.93  | -.86  | -.06  | .32   | -.91  | -.64  | -.37  | -1.53 | -1.68 | -2.62 | -1.61 | -2.23 | -1.87 | -.36   | -2.54 | -1.94 | -3.19 | -3.52 | -3.08  | .65    | -5.94  | -5.99 | -7.48 |       |        |        |        |        |        |        |        |      |      |      |       |       |       |       |      |       |        |       |       |       |       |  |  |  |  |  |  |  |  |  |  |  |  |  |  |  |  |  |  |  |  |  |  |  |  |
| 24S   | 1880 | 1844 | -.37  | .07   | -.87  | 1.02  | -.85  | -2.80 | -2.32 | -.35  | -.45  | -.71  | -2.00 | -1.31 | -.51  | -4.57  | -2.51 | 1.89  | -4.23 | -1.80 | -1.65  | -.40   | -7.62  | -5.84 | -1.04 | -8.74 |        |        |        |        |        |        |        |      |      |      |       |       |       |       |      |       |        |       |       |       |       |  |  |  |  |  |  |  |  |  |  |  |  |  |  |  |  |  |  |  |  |  |  |  |  |
| 25S   | 3344 | 3221 | -.07  | -.01  | -.14  | .09   | .00   | -.10  | -.17  | .06   | -.96  | -1.34 | -.20  | -2.92 | -2.42 | -.13   | -.40  | 7.84  | -.77  | -.94  | .66    | .14    | -.15   | 2.67  | 3.77  | -2.55 | -99.66 |        |        |        |        |        |        |      |      |      |       |       |       |       |      |       |        |       |       |       |       |  |  |  |  |  |  |  |  |  |  |  |  |  |  |  |  |  |  |  |  |  |  |  |  |
| 26S   | 3360 | 3234 | .00   | -.02  | -.02  | -.05  | -.14  | -.26  | -.09  | -.75  | -.62  | -.13  | -.39  | -4.01 | -3.38 | -.05   | -.73  | 1.20  | .16   | .04   | 4.35   | 15.83  | -.78   | 4.01  | -.27  | -.16  | -5.27  | -89.40 |        |        |        |        |        |      |      |      |       |       |       |       |      |       |        |       |       |       |       |  |  |  |  |  |  |  |  |  |  |  |  |  |  |  |  |  |  |  |  |  |  |  |  |
| 27S   | 3394 | 3272 | .10   | .06   | -.13  | -.13  | .00   | -.25  | -.10  | -1.00 | .17   | -2.72 | -.49  | -1.15 | -4.40 | -.01   | -.42  | -1.95 | .69   | .35   | 11.89  | 2.71   | 1.12   | .61   | .00   | .19   | -13.22 | -17.12 | -82.66 |        |        |        |        |      |      |      |       |       |       |       |      |       |        |       |       |       |       |  |  |  |  |  |  |  |  |  |  |  |  |  |  |  |  |  |  |  |  |  |  |  |  |
| 28S   | 3409 | 3273 | .91   | .24   | -.15  | -.31  | -.05  | .03   | -.03  | -.53  | -1.00 | -1.38 | -.64  | -.75  | -.51  | .28    | -6.51 | -.47  | 2.75  | -.08  | .34    | 3.74   | -19.73 | -5.49 | -.58  | .64   | -.49   | -12.97 | -17.61 | -89.98 |        |        |        |      |      |      |       |       |       |       |      |       |        |       |       |       |       |  |  |  |  |  |  |  |  |  |  |  |  |  |  |  |  |  |  |  |  |  |  |  |  |
| 29S   | 3677 | 3488 | 1.08  | -2.93 | 2.02  | -1.42 | .04   | .57   | .47   | .12   | -.60  | .38   | .39   | -.05  | .00   | .52    | .63   | -1.44 | -.24  | -.15  | -.54   | .55    | -13.70 | -3.86 | 16.63 | -5.07 | .37    | -.20   | -.54   | -.64   | 161.94 |        |        |      |      |      |       |       |       |       |      |       |        |       |       |       |       |  |  |  |  |  |  |  |  |  |  |  |  |  |  |  |  |  |  |  |  |  |  |  |  |
| 30S   | 3925 | 3757 | -1.06 | -1.11 | -.69  | -.47  | .06   | .03   | -.15  | .06   | -.76  | -1.20 | -1.42 | -.86  | -1.30 | -.14   | -.98  | -.23  | -3.27 | -3.21 | -.24   | -.13   | -4.63  | -3.10 | -6.61 | -1.70 | .14    | -.05   | -.12   | -.17   | -58.47 | 112.08 |        |      |      |      |       |       |       |       |      |       |        |       |       |       |       |  |  |  |  |  |  |  |  |  |  |  |  |  |  |  |  |  |  |  |  |  |  |  |  |
| 31S   | 4152 | 3973 | -.04  | -.01  | .00   | -.28  | -.01  | -.10  | -.94  | -.09  | -.04  | .02   | .28   | -.03  | -.01  | -6.39  | -.01  | -.12  | -2.76 | -1.42 | -.13   | -.05   | -.09   | -.04  | -.03  | -.69  | -.03   | -.03   | -.02   | -.10   | -.12   | .01    | -79.94 |      |      |      |       |       |       |       |      |       |        |       |       |       |       |  |  |  |  |  |  |  |  |  |  |  |  |  |  |  |  |  |  |  |  |  |  |  |  |
| 1A    | 58   | 59   | -5.62 | -2.25 | -.24  | -.63  | .28   | -.88  | .12   | -.14  | .38   | .23   | -.38  | -.11  | -.19  | .02    | -.39  | -.44  | .13   | -.41  | .83    | -.70   | .20    | -.95  | -.25  | -.27  | -.78   | -.66   | -.50   | -1.48  | .90    | -1.06  | .06    | 1.62 |      |      |       |       |       |       |      |       |        |       |       |       |       |  |  |  |  |  |  |  |  |  |  |  |  |  |  |  |  |  |  |  |  |  |  |  |  |
| 2A    | 110  | 111  | -.37  | .60   | -1.44 | .67   | -.01  | .06   | -.09  | -.15  | -.24  | .09   | -.21  | -.09  | .16   | .06    | -.25  | .05   | -.19  | -.55  | .04    | -.20   | .04    | .30   | .17   | -.24  | .03    | -.05   | -.12   | -.78   | .84    | -.04   | -.39   | .83  | .32  |      |       |       |       |       |      |       |        |       |       |       |       |  |  |  |  |  |  |  |  |  |  |  |  |  |  |  |  |  |  |  |  |  |  |  |  |
| 3A    | 218  | 219  | -2.08 | .57   | .07   | -.07  | -.04  | .32   | -.07  | .37   | .15   | -.04  | -.28  | .01   | -.03  | -.22   | -.29  | -.27  | -.29  | -.83  | -.32   | -.11   | -.15   | -.36  | -.34  | -.36  | -.15   | -.06   | -.12   | -.19   | .13    | -.03   | -.07   | 2.66 | -.54 | .00  |       |       |       |       |      |       |        |       |       |       |       |  |  |  |  |  |  |  |  |  |  |  |  |  |  |  |  |  |  |  |  |  |  |  |  |
| 4A    | 332  | 332  | -.28  | -.20  | -.54  | -.04  | -.40  | .05   | 1.87  | -.43  | 1.56  | -.77  | -.28  | -.81  | -.26  | -.27   | -.52  | -.32  | .08   | -.96  | -.52   | -.05   | -.41   | -.15  | -.35  | -.49  | -.24   | -1.30  | -.34   | -.53   | 1.00   | -.49   | -.22   | 1.96 | 1.22 | -.56 | -.46  |       |       |       |      |       |        |       |       |       |       |  |  |  |  |  |  |  |  |  |  |  |  |  |  |  |  |  |  |  |  |  |  |  |  |
| 5A    | 443  | 435  | -.22  | -.35  | -.14  | -.02  | -.38  | -.70  | -.55  | -.75  | .57   | -1.05 | -2.10 | -.87  | -1.37 | .56    | -.96  | -.64  | .28   | -1.24 | -1.10  | -3.37  | -.69   | -1.03 | -.42  | .06   | -.45   | -1.66  | -.69   | -1.18  | 2.54   | -.23   | -.06   | 1.08 | .51  | .15  | -1.86 | 1.94  |       |       |      |       |        |       |       |       |       |  |  |  |  |  |  |  |  |  |  |  |  |  |  |  |  |  |  |  |  |  |  |  |  |
| 6A    | 527  | 514  | .26   | -.16  | -.24  | .26   | .18   | .05   | -.41  | -1.02 | -.13  | 2.12  | -.89  | .21   | -.23  | 8.70   | -.73  | -.37  | .80   | -.12  | .31    | .02    | .55    | .17   | 1.20  | -1.05 | .24    | .05    | .01    | .30    | -1.79  | -4.93  | -6.09  | -.47 | .83  | .81  | 1.29  | .39   | -8.92 |       |      |       |        |       |       |       |       |  |  |  |  |  |  |  |  |  |  |  |  |  |  |  |  |  |  |  |  |  |  |  |  |
| 7A    | 567  | 561  | -.07  | -.33  | -.46  | -.20  | -.58  | -.44  | -.95  | -1.55 | -2.62 | 1.05  | .83   | 2.21  | .51   | -2.92  | .86   | -.85  | 1.91  | .23   | -.04   | -.27   | 2.50   | 2.01  | 2.54  | .03   | .66    | .09    | .07    | .10    | -1.25  | -11.18 | -2.33  | .20  | -.14 | .75  | 1.52  | -.49  | -7.99 | -1.56 |      |       |        |       |       |       |       |  |  |  |  |  |  |  |  |  |  |  |  |  |  |  |  |  |  |  |  |  |  |  |  |
| 8A    | 635  | 644  | .11   | -.18  | .22   | -.06  | -.65  | -.58  | -.97  | -1.05 | -.03  | -.86  | -.36  | .74   | .58   | .93    | .30   | -.56  | .01   | -1.38 | .05    | .15    | .77    | -.36  | -.05  | .20   | -1.95  | -.76   | -2.25  | -.64   | 1.71   | -.69   | -.38   | .82  | .15  | .89  | 1.62  | -.23  | .24   | -1.05 | 5.78 |       |        |       |       |       |       |  |  |  |  |  |  |  |  |  |  |  |  |  |  |  |  |  |  |  |  |  |  |  |  |
| 9A    | 723  | 721  | -.20  | -.39  | -.62  | .03   | .16   | -.13  | -.43  | -1.36 | -.72  | -1.02 | -.69  | .14   | -.10  | 2.47   | .15   | -2.37 | -1.88 | -.97  | 1.69   | .04    | .86    | -.42  | -.21  | -.20  | -1.72  | -1.34  | -9.13  | -1.18  | 4.69   | -1.57  | -.33   | 2.00 | .11  | .43  | 1.03  | .11   | -1.77 | -.01  | 2.53 | 1.64  |        |       |       |       |       |  |  |  |  |  |  |  |  |  |  |  |  |  |  |  |  |  |  |  |  |  |  |  |  |
| 10A   | 746  | 734  | -.74  | -.72  | -1.57 | .15   | -.24  | -.16  | -.70  | -.86  | .50   | -1.60 | -4.06 | -.25  | -3.35 | 3.50   | .27   | -9.43 | -.26  | -.83  | 1.48   | .28    | 3.76   | .84   | 2.12  | -.38  | -.96   | -1.12  | -4.21  | -.79   | 1.70   | -.83   | -.22   | .83  | -.05 | .69  | -.10  | 2.03  | -4.66 | 1.73  | .42  | -1.76 | -1.30  |       |       |       |       |  |  |  |  |  |  |  |  |  |  |  |  |  |  |  |  |  |  |  |  |  |  |  |  |
| 11A   | 811  | 805  | -.60  | -.59  | -1.47 | .18   | .46   | -.53  | -1.48 | -.53  | -.45  | -1.38 | -2.74 | -.43  | -1.60 | -8.45  | 1.42  | -7.42 | -2.60 | -.95  | -4.22  | 1.62   | 8.65   | 1.69  | 3.25  | -2.00 | -.11   | .03    | .09    | -.04   | 13.50  | -.51   | -.08   | -.97 | .09  | 1.73 | 3.00  | .07   | -1.24 | 3.86  | 3.41 | -.47  | -11.82 | -1.54 |       |       |       |  |  |  |  |  |  |  |  |  |  |  |  |  |  |  |  |  |  |  |  |  |  |  |  |
| 12A   | 858  | 845  | -.16  | .07   | .01   | .12   | -.67  | -.32  | .13   | -.17  | -.67  | -.63  | -.19  | -.54  | -.27  | -.05   | .13   | -.26  | .41   | -1.89 | -.20   | -.68   | -.15   | .91   | -.29  | .13   | -.15   | -4.12  | -4.30  | -11.51 | 1.90   | .13    | -.30   | .49  | -.32 | .13  | -.33  | -1.93 | 2.02  | .92   | 2.62 | 3.10  | .83    | .61   | -1.98 |       |       |  |  |  |  |  |  |  |  |  |  |  |  |  |  |  |  |  |  |  |  |  |  |  |  |
| 13A   | 897  | 887  | -.22  | .14   | .52   | -.21  | -.97  | -.24  | .21   | -.26  | -2.32 | -1.96 | .19   | -.72  | -.26  | -.98   | -1.19 | .57   | .95   | -1.72 | -1.96  | .43    | 1.74   | -.46  | .00   | .12   | -12.61 | -.75   | -3.97  | -.21   | 2.02   | -.31   | -.23   | 3.20 | .35  | .31  | -1.52 | -.30  | 2.58  | .39   | .83  | 2.83  | .79    | -.66  | .07   | -1.62 |       |  |  |  |  |  |  |  |  |  |  |  |  |  |  |  |  |  |  |  |  |  |  |  |  |
| 14A   | 1013 | 994  | .05   | .14   | .19   | .18   | -.47  | -.27  | .22   | -.30  | -1.06 | -1.01 | -.24  | -1.84 | -.70  | -.21   | -.70  | .31   | .25   | -.66  | -.35   | -1.36  | -1.62  | -.42  | -.45  | -.04  | -.25   | -9.03  | -2.15  | -6.41  | .63    | .00    | -.09   | .66  | -.03 | -.31 | -1.03 | -.94  | 1.19  | 1.09  | 1.66 | 1.06  | .73    | 1.45  | -6.93 | -.97  | -4.26 |  |  |  |  |  |  |  |  |  |  |  |  |  |  |  |  |  |  |  |  |  |  |  |  |
| harm. | anh. |      | 1S    | 2S    | 3S    | 4S    | 5S    | 6S    | 7S    | 8S    | 9S    | 10S   | 11S   | 12S   | 13S   | 14S    | 15S   | 16S   | 17S   | 18S   | 19S    | 20S    | 21S    | 22S   | 23S   | 24S   | 25S    | 26S    | 27S    | 28S    | 29S    | 30S    | 31S    | 1A   | 2A   | 3A   | 4A    | 5A    | 6A    | 7A    | 8A   | 9A    | 10A    | 11A   | 12A   | 13A   | 14A   |  |  |  |  |  |  |  |  |  |  |  |  |  |  |  |  |  |  |  |  |  |  |  |  |
